# Supplementary material for: Comparison of single-molecule sequencing and hybrid approaches for finishing the genome of Clostridium autoethanogenum and analysis of CRISPR systems in industrial relevant Clostridia
Source: PubMed Central journal article supplement (PMC4022347; doi:10.1186/1754-6834-7-40), 2014-03-21
Supplement: 1754-6834-7-40-S9.pdf [file 1754-6834-7-40-S9.pdf]

**Additional file 9. RT-PCR data for *C. autoethanogenum* CRISPR-cas system.**

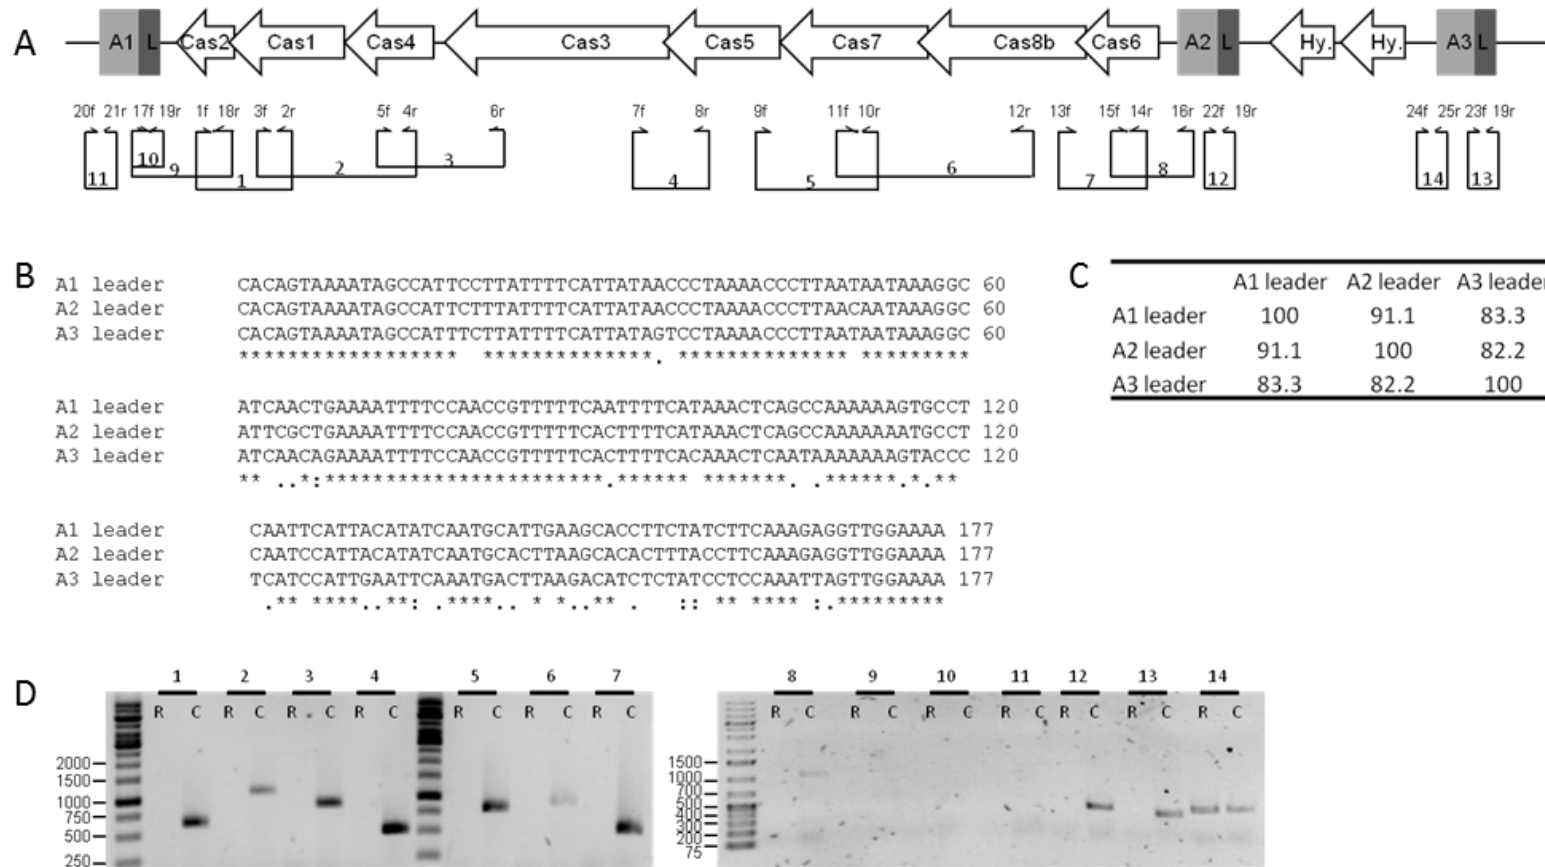

Expression of CRISPR-*cas* loci in *C. autoethanogenum*. (A) The position of primers used in RT-PCR and (B) the agarose gel showing the expression of corresponding PCR products in control (R) and cDNA (C) samples. The numbers in (A) and (B) represent the same primer pairs. (C) Alignment of leader sequence of the three *C. autoethanogenum* CRISPR arrays and (D) table showing the per cent sequence identities between them.

List of primers used for RT-PCR in this study.

| No. | Primer             | Sequence                          | Amplicon (bp) |
|-----|--------------------|-----------------------------------|---------------|
| 1   | Cas2F              | TTTATCCCTAAAGTATCCTCCTCAAAACAGC   | 661           |
| 2   | Cas1R              | TCTGCATGAACCATCTGAAGGAAGATT       |               |
| 3   | Cas1F              | GCTTGTTTACTTGAATTTGCTTTGTGTTTACC  | 1250          |
| 4   | Cas4R              | TGAAAGCAGAAGGAAATAAAAATGCAGAA     |               |
| 5   | Cas4F              | ACCTGCCATTTTACTGCTTCTACATCTGC     | 972           |
| 6   | Cas3R              | TGCAGAAGAACAATTTATGGGAAGGG        |               |
| 7   | Cas3F2             | TCTCCTGCCGAATTATCCTTGTAGA         | 600           |
| 8   | Cas5R2             | ATACAGAATACCTTCCTGTGGCTCT         |               |
| 9   | Cas5F              | TGCTTATTGATAGTAACTACAGCAACTTTGGC  | 900           |
| 10  | Csh2R              | GGCAGTGCAGATAGGTCAAGGATTTAATG     |               |
| 11  | Csh2F              | GGTTTGCTTCTCCGCTTCTTTTCC          | 961           |
| 12  | Csh1R2             | GAGGAAAGAGTATGGATGCAGTTGT         |               |
| 13  | Csh1F2             | TACCTTTGTTCGGATCTACTGGCTTA        | 550           |
| 14  | Cas6R2             | TATTGACAGGAGAGGCTGTGGATAA         |               |
| 15  | Cas6F              | TTACATCTAAGGGGTACAAGCTGTTGAAGC    | 1121          |
| 16  | CRISPR1 distal F   | GCAAATACTGATAAAGTAAACAATA         |               |
| 17  | Cas2R              | TTCTGTTTTTATAGAGGGGCTATAACGACTTCT | 738           |
| 18  | CRIPSR3 proximal R | GGTATAATTTGAAGCTTTTGAAAT          |               |
| 19  | leadR              | TGAAAAACGGTTGGAAAATTTTC           | 475           |
| 20  | CRIPSR3 proximal R | GGTATAATTTGAAGCTTTTGAAAT          |               |
| 21  | CRISPR3distal R2   | CACCTCTTATATAAATAATTCTCTGG        | 211           |
| 22  | CRISPR3 distal F2  | GCTTGAAGAACAAATTCTTGATA           |               |
| 19  | leadR              | TGAAAAACGGTTGGAAAATTTTC           | 418           |
| 23  | A2F                | TGCACAACCTTCGTTAAAACATAATTTAGCG   |               |
| 19  | leadR              | TGAAAAACGGTTGGAAAATTTTC           | 351           |
| 24  | CRISPR2 distal F   | GCGGATCCACAAATATTAATCA            |               |
| 25  | CRISPR2 proximal F | TCATACAACATTTGTTACGG              | 392           |
| 26  | CRISPR2 proximal R | GCAAATACTGATAAAGTAAACAATA         |               |
